# Supplementary material for: Dietary fats promote functional and structural changes in the median eminence blood/spinal fluid interface—the protective role for BDNF
Source: Springer Nature journal article supplement (doi:10.1186/s12974-017-1046-8), 2018-01-09

## Dietary fats promote functional and structural changes in the median eminence blood/spinal fluid interface - The protective role for BDNF

Albina F. Ramalho<sup>1</sup>, Bruna Bombassaro<sup>1</sup>, Nathalia R. Dragano<sup>1</sup>, Carina Solon<sup>1</sup>, Joseane Morari<sup>1</sup>, Milena Fioravante<sup>1</sup>, Roberta Barbizan<sup>1</sup>, Licio A. Velloso<sup>1\*</sup>, Eliana P. Araujo<sup>2</sup>

### Supplementary Data

**Supplementary Figure 1. Evaluation of the impact of a high-fat diet on the expression of Claudin-5 in the median eminence of mice.** Six-week old, male, Swiss mice were randomly divided to feed on chow or a high-fat diet for one, two or four weeks; at the end of the respective experimental periods, the mice were used in experiments. Median eminence was laser microdissected for real-time PCR determination of claudin-5. Expression of target transcripts is presented as relative to paired controls fed chow (line in  $y=1$ ). In all conditions  $n=4$ ; \* $p<0.05$  vs. respective control. W, week.

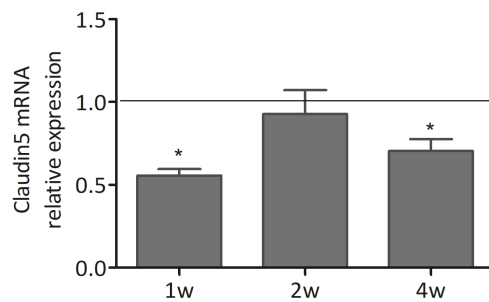

Supplement: MOESM7 [file 15352872]
