# Supplementary material for: Dietary fats promote functional and structural changes in the median eminence blood/spinal fluid interface—the protective role for BDNF
Source: Springer Nature journal article supplement (doi:10.1186/s12974-017-1046-8), 2018-01-09

## Dietary fats promote functional and structural changes in the median eminence blood/spinal fluid interface - The protective role for BDNF

Albina F. Ramalho<sup>1</sup>, Bruna Bombassaro<sup>1</sup>, Nathalia R. Dragano<sup>1</sup>, Carina Solon<sup>1</sup>, Joseane Morari<sup>1</sup>, Milena Fioravante<sup>1</sup>, Roberta Barbizan<sup>1</sup>, Licio A. Velloso<sup>1\*</sup>, Eliana P. Araujo<sup>2</sup>

### Supplementary Data

**Supplementary Figure 3. Immunofluorescence staining of markers of the median eminence blood-brain barrier and markers of glial cells.** Immunofluorescence staining using primary antibodies against IGFBP2 (green), GFAP (red) (A) and IBA1 (red) (B). Specimens were obtained from bregma-anteroposterior -2,06 to -2,18 from mice fed on a high-fat diet (HFD) and treated with either a pre-immune antiserum (IgG) or with an anti-BDNF antibody (BDNF). The images are representative of four independent experiments. 3v, third ventricle; BDNF, brain-derived neurotrophic factor IGFBP2, insulin-like growth-factor binding protein 2; GFAP, glial fibrillary acidic protein. IBA1, ionized calcium-binding adapter molecule-1.

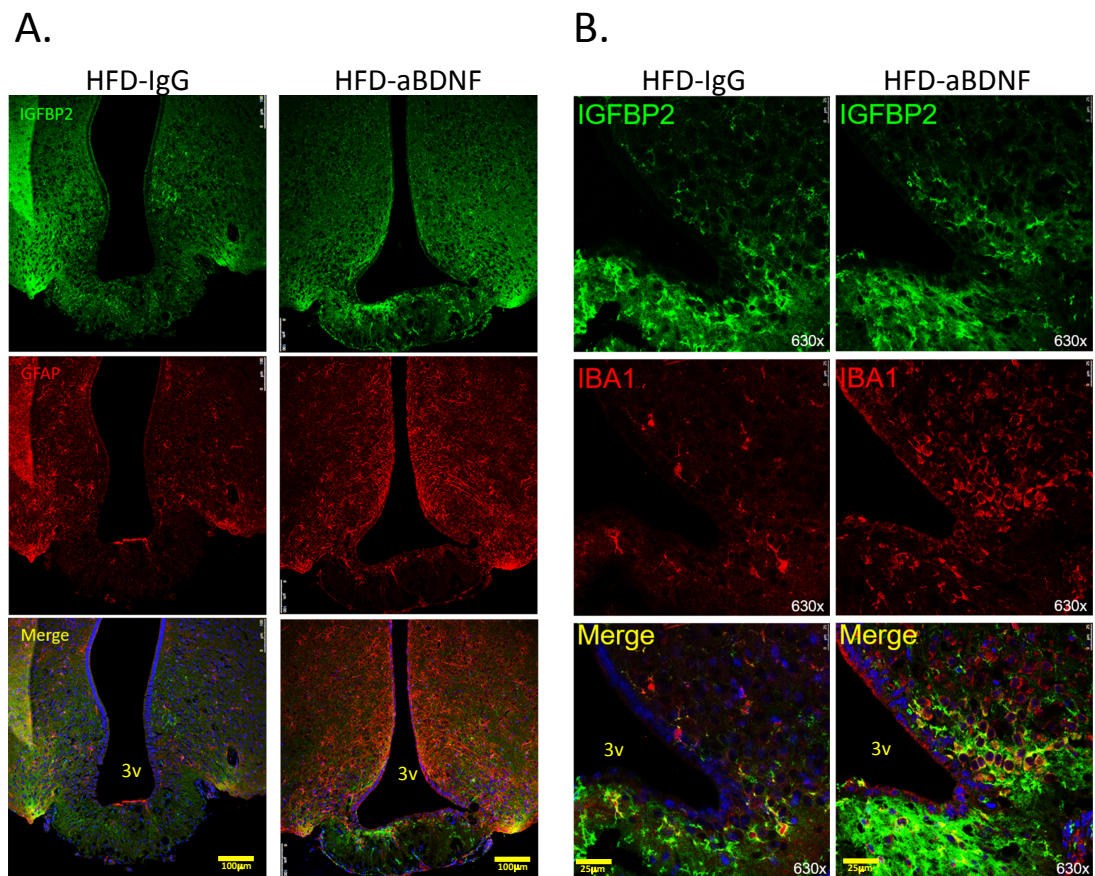

Supplement: MOESM9 [file 15352872]
